# Supplementary material for: A CoOx/FeOx heterojunction on carbon nanotubes prepared by plasma-enhanced atomic layer deposition for the highly efficient electrocatalysis of oxygen evolution reactions
Source: Royal Society of Chemistry journal article supplement (doi:10.1039/c9ta13492a), 2020-01-01
Supplement: c9ta13492a1.pdf [file c9ta13492a1.pdf]

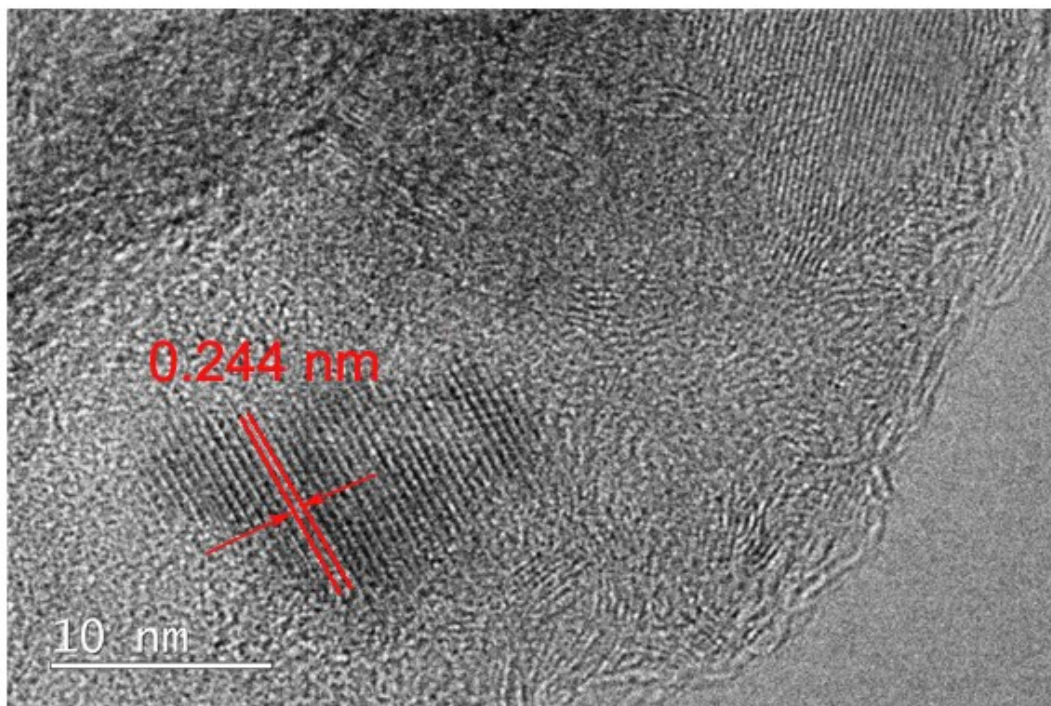

Fig. S1. HRTEM image of CoOx/CNTs electrocatalyst.

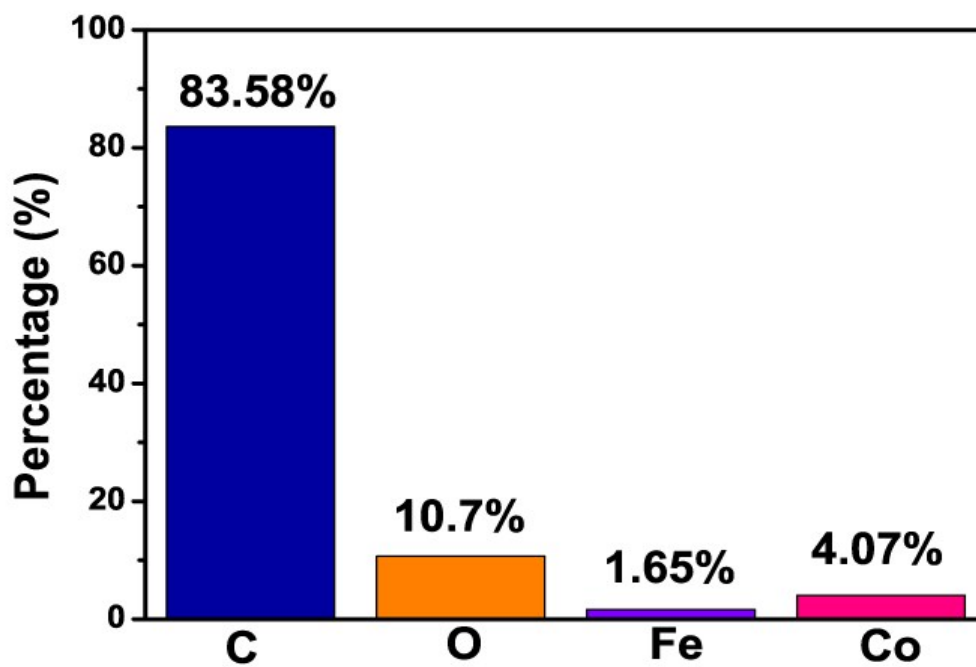

Fig. S2. XPS element contents of CoOx/FeOx/CNTs.

**Table S1.** Comparison of the electrocatalytic performance of CoOx/FeOx/CNTs with various reported non-precious electrocatalysts in alkaline media.

| Electrocatalyst                                                   | OER                                             |                                | Reference        |
|-------------------------------------------------------------------|-------------------------------------------------|--------------------------------|------------------|
|                                                                   | ( $\eta$ (mV) at<br>$j=10 \text{ mA cm}^{-2}$ ) | Tafel (mV dec. <sup>-1</sup> ) |                  |
| Fe/Co-N/S-Cs                                                      | 285                                             | /                              | 29               |
| Fe-Co-S/N-C                                                       | 329                                             | 63.2                           | 30               |
| Co <sub>3</sub> O <sub>4</sub> /Fe <sub>2</sub> O <sub>3</sub> NC | 310                                             | 67                             | 31               |
| NiCo/PFC                                                          | 400                                             | 106                            | 32               |
| CoOx / Fe <sub>2</sub> O <sub>3</sub> /CC                         | 316                                             | 56                             | 11               |
| Co <sub>3</sub> Fe <sub>1.5</sub> -O                              | 284                                             | 60                             | 33               |
| Fe <sub>0.4</sub> Co <sub>0.6</sub>                               | 383                                             | /                              | 34               |
| Fe <sub>1</sub> Co <sub>2</sub> -P/C                              | 362                                             | 50.1                           | 35               |
| Co <sub>3</sub> O <sub>4</sub> /NPGC                              | 450                                             | /                              | 36               |
| Co-N-CNTs                                                         | 460                                             | /                              | 37               |
| SS-Fe-0.5                                                         | 440                                             | 68                             | 38               |
| <b>CoOx/FeOx/CNTs</b>                                             | <b>308</b>                                      | <b>43</b>                      | <b>This work</b> |

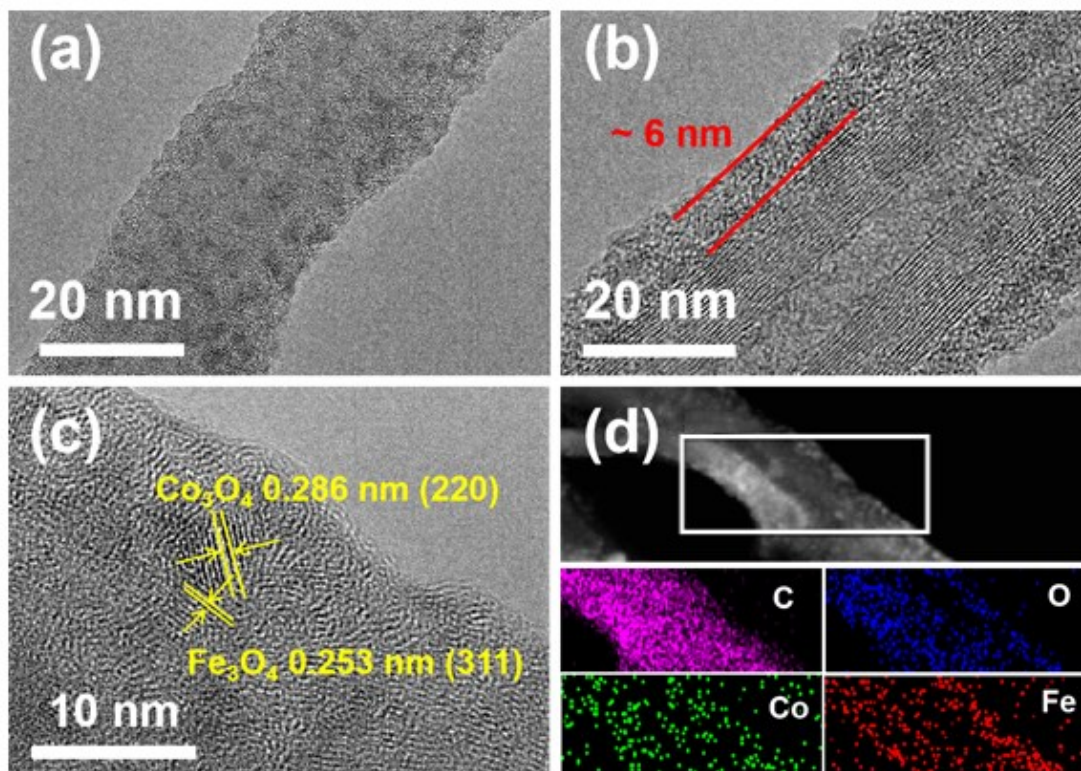

**Fig. S3.** (a and b) TEM images of the CoOx/FeOx/CNTs electrocatalyst after electrochemical test; (c) HRTEM image; (d) TEM-mapping of elements.

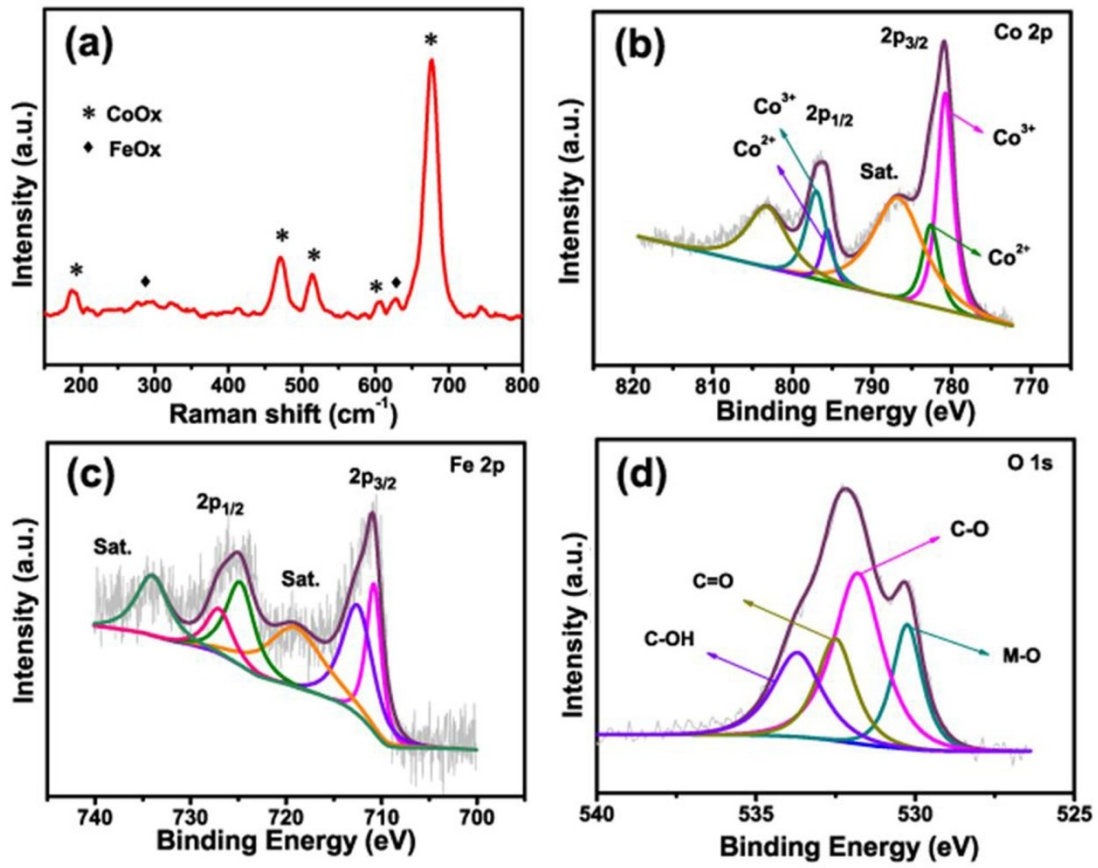

Fig. S4. (a) Raman spectrum and (b) Co 2p; (c) Fe 2p; and (d) O 1s XPS spectra of CoOx/FeOx/CNTs after test.

## Computational Methods

First-principles calculations were performed using Vienna Ab-Initio Simulation Package.<sup>1,2</sup> Exchange-correlation energy was described using the spin-polarized Perdew-Burke-Ernzerhof functional with a energy cutoff of 500 eV. Van der Waals correction was adopted using the Grimme scheme (D2).<sup>3-5</sup> Due to the strong electronic correlations in the localized  $3d$  orbitals of Co and Fe ions, an on-site Coulomb interaction respectively with an effective parameter of  $U - J = 3.3$  and  $4.0$  eV was applied.<sup>6</sup> The lattice constants of bulk  $\text{Co}_3\text{O}_4$  and  $\text{Fe}_3\text{O}_4$  (space group  $\text{FD-3M}$ ) in were calculated to be  $8.09$  and  $8.28$  Å, respectively, in good agreement with previous studies.<sup>7,8</sup> The  $\text{Co}_3\text{O}_4/\text{Fe}_3\text{O}_4$  interface was built by matching an eight-layer slab of  $\text{Co}_3\text{O}_4(110)$  to an eight-layer slab of  $\text{Fe}_3\text{O}_4(311)$  (see Figure S1) according to the experimental observations. The average value of their constants was adopted and kept fixed in the hybrid system, resulting in  $1.15\%$  lattice mismatch. The  $\text{Co}_3\text{O}_4$  surface was modeled by the most energetically favorable  $\text{Co}_3\text{O}_4(110)$ .<sup>9,10</sup> Specifically,  $\text{Co}_4\text{O}_4$ -terminated plane was selected because it was found to be more stable for  $\text{Co}_3\text{O}_4(110)$  surface.<sup>11</sup> A eight-layer slab with a vacuum spacing of at least  $20$  Å was used. The upper four layers including the adsorbates were optimized until the residual forces are less than  $0.01$  eV/Å. A dipole correction<sup>12</sup> was applied due to the asymmetric layer arrangement.

## References:

1. Kresse, G.; Furthmüller, J., Efficient iterative schemes for ab initio total-energy calculations using a plane-wave basis set. *Phys. Rev. B* 1996, 54, 11169-11186.
2. Kresse, G.; Joubert, D., From ultrasoft pseudopotentials to the projector augmented-wave method. *Phys. Rev. B* 1999, 59, 1758-1775.
3. Perdew, J. P.; Burke, K.; Ernzerhof, M., Generalized Gradient Approximation Made Simple. *Phys. Rev. Lett.* 1996, 77, 3865-3868.
4. Grimme, S., Semiempirical GGA-Type Density Functional Constructed with a Long-Range Dispersion Correction. *J. Comput. Chem.* 2006, 27, 1787-1799.

5. Barone, V.; Casarin, M.; Forrer, D.; Pavone, M.; Sambri, M.; Vittadini, A., Role and Effective Treatment of Dispersive Forces in Materials: Polyethylene and Graphite Crystals as Test cases. *J. Comput. Chem.* 2009, 30, 934-939.
6. L. Wang, T. Maxisch and G. Ceder, *Phys. Rev. B*, 2006, 73, 195107–195112.
7. P. Broqvist, I. Panas, H. Persson, *J. Catal.*, 2002, 210, 198.
8. Friak, M.; Schindlmayr, A.; Scheffler, M. *New J. Phys.* 2007, 9, 5.
9. X. Xie, Y. Li, Z.-Q. Liu, M. Haruta, W. Shen, *Nature*. 2009, 458, 746.
10. C. Y. Ma, Z. Mu, J. J. Li, Y. G. Jin, J. Cheng, G. Q. Lu, Z. P. Hao, S. Z. Qiao, *J. Am. Chem. Soc.*, 2010, 132, 2608.
11. J. Chen, A. Selloni, *Phys. Rev. B*, 2012, 85, 085306.

**Table S2.** Thermodynamic data of molecular species. For liquid H<sub>2</sub>O, the entropy was calculated at  $p = 0.035$  atm through  $TS = TS^0 + k_B T \ln(p^0/p)$  because gas-phase H<sub>2</sub>O is in equilibrium with liquid water at 298.15 K under this pressure.

| Molecule            | Total energy (eV) | ZEP (eV) | TS (eV) |
|---------------------|-------------------|----------|---------|
| H <sub>2</sub> (g)  | -6.77             | 0.34     | 0.40    |
| H <sub>2</sub> O(l) | -14.22            | 0.58     | 0.67    |

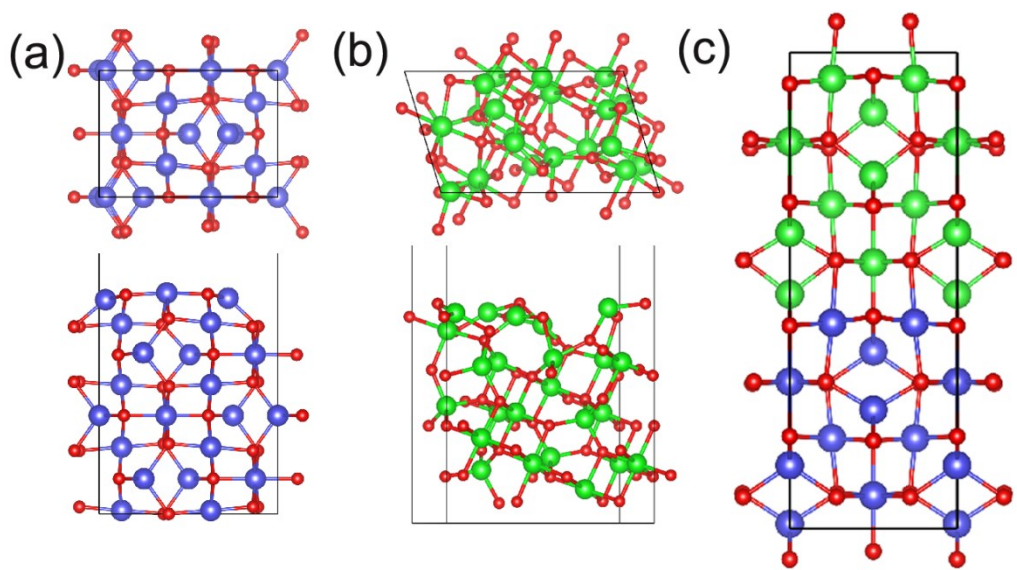

**Fig. S5.** (a) Top (upper panel) and side view (lower panel) of  $\text{Co}_3\text{O}_4(110)$  surface. Blue and red balls represent Co, Fe and O atoms, respectively. (b) Top (upper panel) and side view (lower panel) of  $\text{Fe}_3\text{O}_4(311)$  surface. Green and red balls represent Co, and O atoms, respectively. (c) Side-view of the model structure of  $\text{Co}_3\text{O}_4/\text{Fe}_3\text{O}_4$  hybrid system. Blue, green and red balls represent Co, Fe and O atoms, respectively.

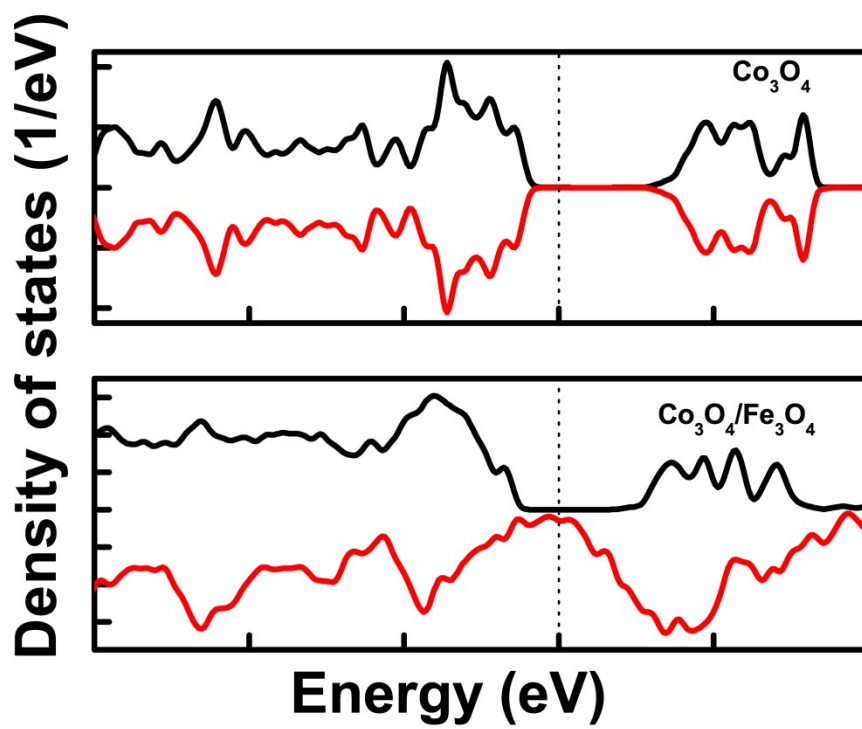

Fig. S6. The density of states (DOS) of  $\text{Co}_3\text{O}_4$  and  $\text{Co}_3\text{O}_4/\text{Fe}_3\text{O}_4$ .
